# Supplementary material for: Gut Microbiota Differs in Composition and Functionality Between Children With Type 1 Diabetes and MODY2 and Healthy Control Subjects: A Case-Control Study
Source: Oxford University Press journal article supplement (doi:10.2337/dc18-0253), 2018-09-17
Supplement: dc180253supplementarydata2.xlsx [file dc180253supplementarydata2.xlsx]

## Sheet: Summary OTUs
#SampleID	Unassigned;Other	k__Bacteria;Other	p__Acidobacteria	p__Actinobacteria	p__Bacteroidetes	p__Spirochaetes	p__Firmicutes	p__Proteobacteria	p__Verrumicrobia	f__Micromonosporaceae	f__Bifidobacteriaceae	f__Coriobacteriaceae	f__Bacteroidaceae	f__Porphyromonadaceae	f__Prevotellaceae	f__Rikenellaceae	f__Barnesiellaceae	f__Odoribacteraceae	f__Paraprevotellaceae	f__Chitinophagaceae	f__Alicyclobacillaceae	f__Streptococcaceae	f__Turicibacteraceae	f__Christensenellaceae	f__Clostridiaceae	f__Lachnospiraceae	f__Ruminococcaceae	f__Veillonellaceae	f__Mogibacteriaceae	f__Erysipelotrichaceae	f__Alcaligenaceae	f__Desulfovibrionaceae	f__Enterobacteriaceae	f__Pasteurellaceae	f__Spirochaetaceae	g__Couchioplanes	g__Bifidobacterium	g__Adlercreutzia	g__Enterobacter	g__Slackia	g__5.7N15	g__Bacteroides	g__Parabacteroides	g__Porphyromonas	g__Prevotella	g__Butyricimonas	g__Odoribacter	g__Paraprevotella	g__Streptococcus
DM1.31	199	0	0	2	641	0	122	30	0	0	2	0	314	53	4	43	0	7	0	0	0	5	0	0	4	42	92	32	0	11	9	3	12	0	0	0	2	0	25	0	0	314	52	0	34	0	7	0	35
DM1.4	163	0	0	1	602	0	261	2	2	0	7	1	229	23	7	65	9	3	28	0	1	8	1	0	0	28	139	46	0	2	15	0	9	0	2	0	4	0	0	0	0	328	23	0	27	0	3	5	24
DM1.5	185	1	0	2	481	0	187	6	0	1	5	0	320	48	9	54	7	17	0	0	0	6	0	0	0	20	106	59	0	11	7	0	11	0	0	5	5	0	20	2	0	218	42	6	0	8	9	0	26
DM1.21	225	0	0	4	616	0	180	23	0	0	9	0	272	57	0	26	2	4	0	0	0	1	0	0	0	34	172	45	0	12	22	0	0	1	0	0	0	0	19	0	4	321	56	0	0	0	4	0	9
DM1.12	131	4	8	3	554	9	202	4	0	0	3	0	198	12	9	44	12	7	0	0	0	9	1	1	8	22	126	67	1	21	12	0	13	1	0	0	3	0	13	0	0	310	12	0	9	3	4	1	21
DM1.7	294	0	0	1	646	0	155	31	0	0	6	1	304	11	5	89	5	5	0	1	0	5	0	0	2	25	74	51	0	3	15	5	18	0	0	0	4	0	24	0	0	294	11	0	5	5	0	0	35
DM11	121	0	0	3	702	0	147	22	0	0	6	0	358	46	7	48	11	2	0	0	0	8	0	1	0	32	211	65	0	9	8	3	15	0	0	0	6	0	25	0	0	290	44	2	7	1	1	0	28
DM1.9	180	1	0	3	485	0	201	9	0	0	2	0	367	120	6	96	9	4	0	0	0	3	0	0	0	23	83	87	0	4	5	1	17	0	0	0	0	0	0	0	0	185	120	0	3	1	3	0	33
DM1.1	228	1	0	4	476	3	172	7	0	0	5	0	319	8	3	76	17	9	0	1	0	9	0	0	0	41	98	36	1	14	7	1	12	0	0	0	5	0	0	1	0	299	8	0	2	7	2	0	11
DM1.17	168	3	1	1	427	0	143	13	0	0	2	0	329	22	12	97	2	8	0	0	0	5	1	0	3	24	94	67	0	6	8	0	25	0	0	0	2	1	26	0	0	299	22	0	0	0	8	0	5
DM1.14	89	4	4	3	584	2	150	22	0	0	2	0	398	3	3	91	12	0	0	1	0	4	1	0	3	21	170	48	5	2	13	1	0	1	0	0	2	0	32	0	0	185	3	0	3	0	0	0	34
DM1.2	208	1	0	1	623	0	141	30	0	1	4	1	317	27	4	92	17	1	5	0	0	6	0	0	6	28	146	28	0	6	15	2	13	0	0	2	4	1	17	0	0	300	26	1	3	0	1	0	7
DM1.12	246	0	0	2	585	0	117	14	0	0	0	0	223	9	9	71	16	6	3	0	0	5	1	1	1	13	145	68	0	8	18	1	8	1	0	0	3	2	28	3	0	225	9	0	1	1	5	0	15
DM1.8	187	4	0	2	657	0	142	2	0	1	0	0	163	19	13	95	22	3	0	0	0	7	1	0	0	29	158	31	1	2	12	0	0	0	0	3	0	0	27	0	0	286	19	0	0	0	3	0	6
DM1.6	223	0	0	3	671	0	211	7	3	0	0	0	472	55	2	59	15	10	0	0	0	5	0	0	0	27	64	38	0	1	4	1	19	0	1	0	1	0	24	1	0	172	55	0	3	0	10	0	25
MODY.G	124	0	0	14	433	0	490	58	0	1	13	0	171	44	23	8	14	0	0	1	0	0	0	0	2	54	38	46	0	0	8	12	8	0	0	1	8	0	5	0	0	171	43	1	3	0	0	0	13
MODY.K	168	0	0	24	103	0	334	9	0	1	0	0	104	39	26	15	12	6	5	1	0	2	0	0	0	59	26	64	0	2	4	2	7	0	0	1	23	0	25	0	0	154	39	0	55	2	4	28	11
MODY.H	258	0	0	12	467	4	216	6	5	0	19	1	228	21	24	5	16	6	0	0	0	0	1	1	0	41	36	12	0	1	18	0	0	0	0	0	2	0	2	0	0	158	19	0	4	0	6	0	0
MODY.B	204	0	0	11	447	0	249	17	2	0	13	2	171	39	41	15	21	6	0	0	1	2	0	0	0	45	28	17	0	3	8	1	2	0	2	0	0	0	15	0	0	169	39	0	31	2	4	0	6
MODY.E	143	0	0	13	278	0	376	6	3	0	31	0	224	45	33	13	3	2	1	0	0	3	1	0	1	42	34	21	1	1	12	0	3	0	1	0	0	0	14	0	0	114	45	0	93	0	2	0	10
MODY.D	181	2	5	12	326	7	261	7	0	0	5	0	214	15	21	18	10	25	0	0	0	4	1	0	0	48	26	31	0	1	0	3	4	0	0	0	22	0	0	0	0	154	15	0	1	16	9	0	9
MODY.J	93	1	1	13	349	0	356	15	0	0	12	0	209	108	29	7	19	14	0	0	0	1	0	1	0	28	35	28	0	3	1	3	9	0	0	0	11	0	0	0	0	129	104	3	79	1	13	0	7
MODY.Z	107	0	0	13	357	0	641	17	0	0	7	0	214	20	42	23	17	11	0	0	0	2	0	1	4	48	33	32	0	16	1	2	4	0	0	0	11	1	7	0	0	141	20	0	0	0	11	0	8
MODY.S	290	0	0	3	380	0	576	20	3	0	7	0	119	56	21	13	7	4	0	0	1	2	0	0	0	38	29	28	0	13	16	3	7	0	0	0	13	0	5	0	0	169	55	0	6	2	2	0	6
MODY.W	122	4	6	41	511	1	437	9	0	0	8	1	137	58	15	14	17	28	0	1	0	0	0	0	0	29	47	19	0	4	16	2	9	0	0	0	21	0	7	0	0	136	56	0	55	20	8	0	0
MODY.R	112	2	1	31	106	0	425	9	0	0	13	0	106	60	13	12	18	31	0	1	0	3	0	0	0	24	43	25	0	5	7	0	10	1	0	0	4	0	12	0	0	106	60	0	2	7	24	0	7
MODY.Y	34	0	0	13	336	0	628	10	0	0	0	0	220	19	21	13	15	5	0	0	0	0	0	0	1	33	61	28	0	0	12	1	0	1	0	0	15	0	0	0	0	110	19	0	8	0	5	5	0
MODY.X	56	0	0	82	384	0	343	17	0	0	11	0	148	22	12	11	13	31	0	0	0	4	0	0	0	35	40	34	1	4	2	0	5	0	0	0	12	0	13	1	0	148	22	0	2	23	8	3	5
MODY.I	66	0	0	10	382	0	432	3	0	0	8	0	157	20	2	17	15	3	0	0	0	0	0	0	2	50	41	26	0	2	15	0	9	0	0	0	23	0	0	0	0	127	20	0	2	1	2	0	0
MODY.A	232	0	0	6	485	0	471	33	3	0	5	1	78	191	41	16	18	14	0	1	1	2	1	0	3	24	27	18	1	0	10	0	13	0	1	0	12	0	17	0	0	112	191	0	80	2	12	0	8
HM1	209	1	3	52	506	0	222	56	0	0	28	0	237	55	2	64	21	15	0	1	0	1	0	0	0	59	101	24	0	5	3	1	0	0	0	0	23	0	0	0	0	296	55	0	0	0	15	0	9
HM2	101	0	0	54	603	0	251	63	0	0	23	0	220	48	1	57	4	14	0	0	0	0	0	0	2	44	46	10	0	4	0	1	4	0	0	0	0	1	0	0	0	210	48	0	0	14	0	0	0
HM44	413	0	0	11	395	0	177	27	0	0	2	1	213	35	4	35	0	5	0	0	0	1	0	0	4	97	38	22	0	3	17	1	3	0	0	0	9	0	1	1	2	163	35	0	0	0	5	0	7
HM12	217	2	2	11	284	5	279	41	0	0	23	0	219	3	3	2	0	3	0	1	0	1	11	1	5	74	34	9	0	9	0	0	4	0	0	0	3	0	2	0	0	124	3	0	3	0	3	0	3
HM13	92	0	0	35	667	0	203	62	0	0	19	0	149	40	2	56	27	13	0	0	0	1	0	0	1	96	93	13	0	3	11	0	3	0	0	0	33	0	0	0	0	193	40	0	0	2	11	0	1
HM45	180	0	0	30	600	12	389	36	0	0	22	1	201	66	5	94	0	56	0	0	0	0	3	0	0	135	132	15	0	2	9	2	0	0	0	0	5	0	1	0	9	220	66	0	0	17	39	0	0
HM32	478	0	0	79	355	0	286	37	0	0	17	0	273	50	2	42	17	14	0	0	0	1	0	0	1	45	116	5	0	2	0	0	1	2	0	0	29	0	0	0	0	173	50	0	2	0	14	0	9
HM16	91	0	0	21	303	0	319	12	0	0	19	0	262	9	0	35	28	12	1	0	0	1	2	0	1	63	144	17	1	15	13	0	1	1	0	0	14	0	0	0	0	162	9	0	0	5	7	1	1
HM41	257	0	0	10	572	0	226	22	0	0	25	1	203	14	3	24	6	9	0	0	0	1	1	0	6	96	66	12	0	2	10	2	0	0	0	0	17	0	1	0	1	204	14	0	0	2	7	0	3
HM3	327	5	1	39	435	1	299	20	0	0	31	0	210	65	1	35	18	0	0	0	0	1	0	1	0	19	69	12	0	0	0	0	0	0	0	0	3	0	1	0	0	200	65	0	0	0	0	0	5
HM42	354	0	0	61	345	0	364	23	0	0	14	0	231	16	1	27	9	2	0	0	0	2	0	0	7	120	55	12	1	6	3	0	5	0	0	0	23	0	2	0	1	230	16	0	0	0	2	0	3
HM20	46	0	0	23	468	0	148	21	0	0	19	0	222	26	3	35	19	28	0	0	0	2	1	1	1	49	46	12	0	21	10	1	0	0	0	0	12	0	0	0	0	219	26	0	0	6	22	0	3
HM43	356	0	0	11	289	0	236	18	0	0	21	0	200	32	2	61	3	5	0	0	0	0	0	0	0	110	96	21	0	10	8	3	1	1	0	0	26	0	2	0	1	199	32	0	2	0	5	0	9
[truncated: 20 more columns]
